# Supplementary material for: Solvent Bar Micro-Extraction of Heavy Metals from Natural Water Samples Using 3-Hydroxy-2-Naphthoate-Based Ionic Liquids
Source: MDPI journal article supplement (doi:10.3390/molecules23113011), 2018-11-17
Supplement: s1 [file s1]

Supplementary information for:

## **Solvent bar micro-extraction of heavy metals from natural water samples using 3-hydroxy-2-naphthoate-based ionic liquids**

**Philip Pirkwieser<sup>1,2</sup>, José A. López-López<sup>2</sup>, Wolfgang Kandioller<sup>1</sup>, Bernhard K. Keppler<sup>1</sup>, Carlos Moreno<sup>2</sup> and Franz Jirsa<sup>1,3\*</sup>**

<sup>1</sup> Institute of Inorganic Chemistry, Faculty of Chemistry, University of Vienna, Waehringer Strasse 42, 1090 Vienna, Austria

<sup>2</sup> Department of Analytical Chemistry, Faculty of Marine and Environmental Sciences, Instituto de Investigación Marina (INMAR), University of Cádiz, PC 11510, Puerto Real, Spain

<sup>3</sup> Department of Zoology, University of Johannesburg, PO Box 524, Auckland Park, 2006, Johannesburg, South Africa

\* Correspondence: franz.jirsa@univie.ac.at

### Table of contents

Table S1: Summarized results for the optimization of extraction efficacy. Considered were all metals that showed an extraction efficacy >40% after the time dependent experiments for each setup respectively.

Table S2: Summarized results for leaching during extraction.

Figure S1: Time dependency of extraction and leaching using pure [P66614][HNA], pH = 8.0 (n=3, error bars =  $\pm$ SD).

Table S1: Summarized results for the optimization of extraction efficacy. Considered were all metals that showed an extraction efficacy >40% after the time dependent experiments for each setup respectively.

|                              |     | Extraction efficacy $\pm$ SD (%) |                           |                           |  |                            |                |                            |  |                            |                           |                           |  |
|------------------------------|-----|----------------------------------|---------------------------|---------------------------|--|----------------------------|----------------|----------------------------|--|----------------------------|---------------------------|---------------------------|--|
|                              |     | Cu                               |                           |                           |  | Ag                         |                | Cd                         |  | Pb                         |                           |                           |  |
|                              |     | [P <sub>66614</sub> ][HNA]       | [P <sub>1888</sub> ][HNA] | [N <sub>1888</sub> ][HNA] |  | [P <sub>66614</sub> ][HNA] |                | [P <sub>66614</sub> ][HNA] |  | [P <sub>66614</sub> ][HNA] | [P <sub>1888</sub> ][HNA] | [N <sub>1888</sub> ][HNA] |  |
| Dodecan-1-ol<br>(wt%)        | 90  | n/a                              | 45.6 $\pm$ 1.3            | 29.5 $\pm$ 1.6            |  | n/a                        |                | n/a                        |  | n/a                        | 28.1 $\pm$ 1.7            | 12.9 $\pm$ 0.8            |  |
|                              | 75  | <5                               | 70.4 $\pm$ 4.7            | 40.0 $\pm$ 7.0            |  | 35.2 $\pm$ 2.9             | 5.5 $\pm$ 0.9  | <5                         |  | 40.8 $\pm$ 2.8             | 37.7 $\pm$ 8.3            |                           |  |
|                              | 60  | n/a                              | 83.7 $\pm$ 2.5            | 80.3 $\pm$ 1.4            |  | n/a                        | n/a            | n/a                        |  | 47.6 $\pm$ 0.8             | 47.3 $\pm$ 6.8            |                           |  |
|                              | 50  | <5                               | 87.4 $\pm$ 0.8            | 90.1 $\pm$ 1.7            |  | 73.8 $\pm$ 2.5             | 4.4 $\pm$ 0.4  | 20.9 $\pm$ 6.7             |  | 50.4 $\pm$ 2.1             | 69.1 $\pm$ 2.7            |                           |  |
|                              | 25  | 30.6 $\pm$ 2.8                   | n/a                       | n/a                       |  | 74.8 $\pm$ 2.6             | 9.1 $\pm$ 3.0  | 54.3 $\pm$ 3.0             |  | n/a                        | n/a                       |                           |  |
|                              | 0   | 55.5 $\pm$ 3.7                   | n/a                       | n/a                       |  | 80.2 $\pm$ 1.2             | 27.9 $\pm$ 3.2 | 70.1 $\pm$ 3.4             |  | n/a                        | n/a                       |                           |  |
| pH                           | 2   | <5                               | <5                        | <5                        |  | 76.9 $\pm$ 0.9             | <5             | <5                         |  | <5                         | <5                        |                           |  |
|                              | 4   | 33.8 $\pm$ 2.1                   | <5                        | <5                        |  | 83.2 $\pm$ 1.0             | 11.4 $\pm$ 1.6 | 55.8 $\pm$ 2.8             |  | 16.8 $\pm$ 1.9             | <5                        |                           |  |
|                              | 6   | 54.0 $\pm$ 3.4                   | 37.6 $\pm$ 3.6            | 56.1 $\pm$ 1.0            |  | 82.4 $\pm$ 1.3             | 18.9 $\pm$ 1.2 | 64.7 $\pm$ 3.5             |  | 15.5 $\pm$ 2.4             | 32.5 $\pm$ 3.3            |                           |  |
|                              | 8   | 55.5 $\pm$ 3.7                   | 87.4 $\pm$ 0.8            | 90.1 $\pm$ 1.7            |  | 80.2 $\pm$ 1.2             | 27.9 $\pm$ 3.2 | 70.1 $\pm$ 3.4             |  | 50.4 $\pm$ 2.1             | 69.1 $\pm$ 2.7            |                           |  |
| Stirring rate<br>(rpm)       | 0   | 17.3 $\pm$ 0.6                   | 15.5 $\pm$ 4.7            | 28.2 $\pm$ 2.9            |  | 39.5 $\pm$ 0.7             | 15.4 $\pm$ 0.3 | 11.6 $\pm$ 1.4             |  | 19.1 $\pm$ 2.2             | 16.1 $\pm$ 1.2            |                           |  |
|                              | 100 | 42.4 $\pm$ 1.1                   | 59.4 $\pm$ 0.8            | 61.0 $\pm$ 0.9            |  | 53.3 $\pm$ 1.8             | 23.2 $\pm$ 0.4 | 48.6 $\pm$ 1.6             |  | 32.6 $\pm$ 1.3             | 35.0 $\pm$ 1.7            |                           |  |
|                              | 300 | 56.8 $\pm$ 1.0                   | 75.1 $\pm$ 0.1            | 85.6 $\pm$ 1.8            |  | 73.5 $\pm$ 0.4             | 29.4 $\pm$ 0.4 | 56.4 $\pm$ 2.0             |  | 44.9 $\pm$ 2.0             | 73.3 $\pm$ 3.1            |                           |  |
|                              | 600 | 55.5 $\pm$ 3.7                   | 87.4 $\pm$ 0.8            | 90.1 $\pm$ 1.7            |  | 80.2 $\pm$ 1.2             | 27.9 $\pm$ 3.2 | 70.1 $\pm$ 3.4             |  | 50.4 $\pm$ 2.1             | 69.1 $\pm$ 2.7            |                           |  |
|                              | 800 | 63.1 $\pm$ 0.0                   | 74.1 $\pm$ 4.3            | 87.8 $\pm$ 3.5            |  | 81.4 $\pm$ 1.4             | 27.2 $\pm$ 0.2 | 70.7 $\pm$ 3.6             |  | 57.5 $\pm$ 3.0             | 68.0 $\pm$ 4.4            |                           |  |
| Fiber length<br>(cm)         | 10  | 45.7 $\pm$ 0.2                   | 72.3 $\pm$ 3.8            | 75.7 $\pm$ 0.8            |  | 70.9 $\pm$ 1.1             | 14.5 $\pm$ 2.5 | 62.2 $\pm$ 1.6             |  | 29.9 $\pm$ 1.7             | 54.7 $\pm$ 2.1            |                           |  |
|                              | 15  | 55.5 $\pm$ 3.7                   | 87.4 $\pm$ 0.8            | 90.1 $\pm$ 1.7            |  | 80.2 $\pm$ 1.2             | 27.9 $\pm$ 3.2 | 70.1 $\pm$ 3.4             |  | 50.4 $\pm$ 2.1             | 69.1 $\pm$ 2.7            |                           |  |
|                              | 20  | 57.4 $\pm$ 0.9                   | 88.7 $\pm$ 1.4            | 82.7 $\pm$ 1.5            |  | 81.8 $\pm$ 0.6             | 27.1 $\pm$ 2.8 | 65.3 $\pm$ 2.0             |  | 39.5 $\pm$ 3.2             | 61.3 $\pm$ 0.9            |                           |  |
| NaCl<br>(g L <sup>-1</sup> ) | 0   | 55.5 $\pm$ 3.7                   | 87.4 $\pm$ 0.8            | 90.1 $\pm$ 1.7            |  | 80.2 $\pm$ 1.2             | 27.9 $\pm$ 3.2 | 70.1 $\pm$ 3.4             |  | 50.4 $\pm$ 2.1             | 69.1 $\pm$ 2.7            |                           |  |
|                              | 5   | 54.2 $\pm$ 2.3                   | 77.9 $\pm$ 3.7            | 50.1 $\pm$ 1.9            |  | 72.3 $\pm$ 0.8             | 41.4 $\pm$ 1.2 | 64.5 $\pm$ 2.9             |  | 31.6 $\pm$ 1.9             | 19.3 $\pm$ 2.3            |                           |  |
|                              | 10  | 59.1 $\pm$ 1.1                   | 79.7 $\pm$ 3.7            | 53.3 $\pm$ 1.5            |  | 74.2 $\pm$ 0.7             | 66.5 $\pm$ 2.6 | 73.1 $\pm$ 3.2             |  | 39.7 $\pm$ 2.6             | 18.4 $\pm$ 1.4            |                           |  |
|                              | 15  | 53.7 $\pm$ 1.5                   | 60.7 $\pm$ 3.7            | 56.3 $\pm$ 2.0            |  | 60.3 $\pm$ 2.6             | 72.3 $\pm$ 0.9 | 38.6 $\pm$ 1.6             |  | 21.6 $\pm$ 2.8             | 26.4 $\pm$ 0.6            |                           |  |
|                              | 30  | 53.8 $\pm$ 2.3                   | 77.2 $\pm$ 1.5            | 47.2 $\pm$ 1.4            |  | 63.9 $\pm$ 1.2             | 78.0 $\pm$ 1.6 | 29.9 $\pm$ 4.2             |  | <5                         | 8.8 $\pm$ 0.6             |                           |  |
|                              | 60  | 46.6 $\pm$ 2.2                   | 36.4 $\pm$ 2.0            | 40.6 $\pm$ 2.0            |  | 55.2 $\pm$ 1.8             | 86.5 $\pm$ 1.9 | 22.1 $\pm$ 3.1             |  | <5                         | 9.9 $\pm$ 1.5             |                           |  |

n/a= not applicable.

Table S2: Summarized results for leaching during extraction. WWTP = wastewater treatment plant, DOC = dissolved organic carbon.

|                                |     | Leaching $\pm$ SD (mg L <sup>-1</sup> DOC) |  |                           |            |                           |     |  |
|--------------------------------|-----|--------------------------------------------|--|---------------------------|------------|---------------------------|-----|--|
|                                |     | [P <sub>66614</sub> ][HNA]                 |  | [P <sub>1888</sub> ][HNA] |            | [N <sub>1888</sub> ][HNA] |     |  |
| <b>Dodecan-1-ol (wt%)</b>      | 90  | n/a                                        |  | 14.9 $\pm$ 1.4            | 6.2 $\pm$  |                           | 0.9 |  |
|                                | 75  | 11.6 $\pm$ 0.6                             |  | 19.3 $\pm$ 0.9            | 9.0 $\pm$  |                           | 0.2 |  |
|                                | 60  | n/a                                        |  | 21.1 $\pm$ 1.1            | 15.6 $\pm$ |                           | 0.8 |  |
|                                | 50  | 13.9 $\pm$ 0.1                             |  | 20.6 $\pm$ 0.2            | 19.4 $\pm$ |                           | 0.6 |  |
|                                | 25  | 12.8 $\pm$ 0.1                             |  | n/a                       | n/a        |                           |     |  |
|                                | 0   | 11.3 $\pm$ 0.7                             |  | n/a                       | n/a        |                           |     |  |
| <b>pH</b>                      | 2   | 2.9 $\pm$ 0.2                              |  | 12.6 $\pm$ 0.3            | 8.0 $\pm$  |                           | 0.3 |  |
|                                | 4   | 7.6 $\pm$ 0.5                              |  | 16.6 $\pm$ 0.9            | 13.2 $\pm$ |                           | 0.2 |  |
|                                | 6   | 10.1 $\pm$ 0.5                             |  | 18.2 $\pm$ 0.6            | 15.1 $\pm$ |                           | 0.9 |  |
|                                | 8   | 11.3 $\pm$ 0.7                             |  | 20.6 $\pm$ 0.2            | 19.4 $\pm$ |                           | 0.6 |  |
| <b>Stirring rate (rpm)</b>     | 0   | 7.9 $\pm$ 0.3                              |  | 16.2 $\pm$ 0.9            | 13.3 $\pm$ |                           | 0.5 |  |
|                                | 100 | 10.9 $\pm$ 0.6                             |  | 22.8 $\pm$ 1.2            | 18.3 $\pm$ |                           | 1.0 |  |
|                                | 300 | 11.4 $\pm$ 0.4                             |  | 21.7 $\pm$ 1.8            | 18.7 $\pm$ |                           | 0.3 |  |
|                                | 600 | 11.3 $\pm$ 0.7                             |  | 20.6 $\pm$ 0.2            | 19.4 $\pm$ |                           | 0.6 |  |
|                                | 800 | 11.7 $\pm$ 0.4                             |  | 24.8 $\pm$ 2.2            | 19.9 $\pm$ |                           | 0.6 |  |
| <b>Fiber length (cm)</b>       | 10  | 7.0 $\pm$ 0.9                              |  | 17.5 $\pm$ 1.2            | 14.9 $\pm$ |                           | 0.2 |  |
|                                | 15  | 11.3 $\pm$ 0.7                             |  | 20.6 $\pm$ 0.2            | 19.4 $\pm$ |                           | 0.6 |  |
|                                | 20  | 19.5 $\pm$ 1.8                             |  | 24.5 $\pm$ 0.9            | 21.0 $\pm$ |                           | 0.5 |  |
| <b>NaCl (g L<sup>-1</sup>)</b> | 0   | 11.3 $\pm$ 0.7                             |  | 20.6 $\pm$ 0.2            | 19.4 $\pm$ |                           | 0.6 |  |
|                                | 5   | 13.9 $\pm$ 0.3                             |  | 19.2 $\pm$ 0.9            | 12.3 $\pm$ |                           | 0.5 |  |
|                                | 10  | 16.1 $\pm$ 0.5                             |  | 21.6 $\pm$ 0.9            | 14.5 $\pm$ |                           | 0.1 |  |
|                                | 15  | 13.9 $\pm$ 0.2                             |  | 16.7 $\pm$ 0.7            | 14.7 $\pm$ |                           | 0.1 |  |
|                                | 30  | 10.2 $\pm$ 0.1                             |  | 23.4 $\pm$ 1.9            | 11.2 $\pm$ |                           | 0.2 |  |
|                                | 60  | 12.6 $\pm$ 0.4                             |  | 24.4 $\pm$ 2.1            | 14.7 $\pm$ |                           | 0.2 |  |
| <b>Drinking water</b>          |     | 16.2 $\pm$ 1.3                             |  | 24.5 $\pm$ 2.0            | 19.4 $\pm$ |                           | 0.5 |  |
| <b>WWTP effluent</b>           |     | 3.8 $\pm$ 0.3                              |  | 25.4 $\pm$ 0.4            | 19.3 $\pm$ |                           | 0.2 |  |
| <b>Sea water</b>               |     | 12.2 $\pm$ 0.3                             |  | 29.7 $\pm$ 0.1            | 26.1 $\pm$ |                           | 2.7 |  |
| <b>Hypersaline water</b>       |     | 11.3 $\pm$ 0.9                             |  | 27.0 $\pm$ 0.0            | 24.6 $\pm$ |                           | 0.5 |  |

n/a= not applicable.

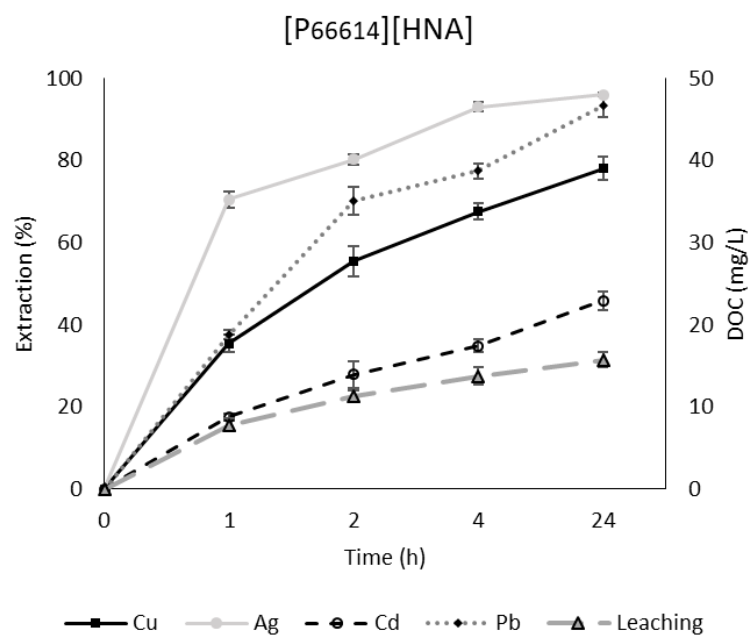

Figure S1: Time dependency of extraction and leaching using pure [P<sub>66614</sub>][HNA], pH = 8.0 (n=3, error bars =  $\pm$ SD).
